# Supplementary material
Source: publisher figshare collection journal article supplement (https://acs.figshare.com/ndownloader/files/7615336)
Supplement: Supplementary file 1 [file 7615336]

## Supporting Information

### Catalytic Conversion of Model Oxygenates in X oil from Caprolactam

#### Manufacture

*Naixin Wang,\* Xieqing Wang, Zelong Liu, Yuxia Zhu*

Research Institute of Petroleum Processing, SINOPEC, Beijing 100083, China

Boiling point range of OLPs from catalytic conversion of cyclohexanol, cyclohexanone, bicyclic ketones, oxydicyclohexane, and cyclohexyl butyrate at various temperatures are shown from Figure S1~ Figure S5 separately.

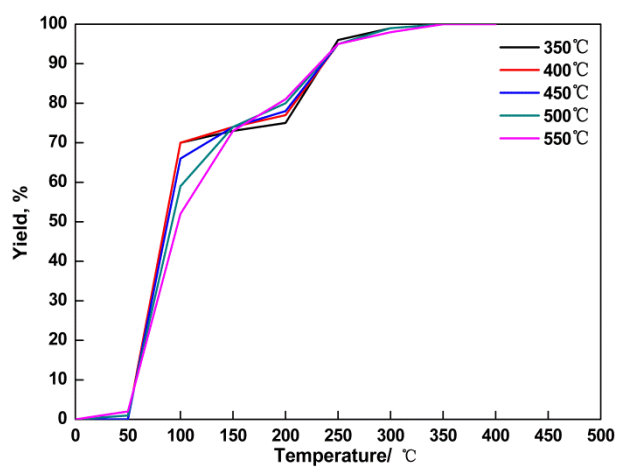

**Figure S1. Boiling point range of OLP from the catalytic conversion of cyclohexanol at various temperatures**

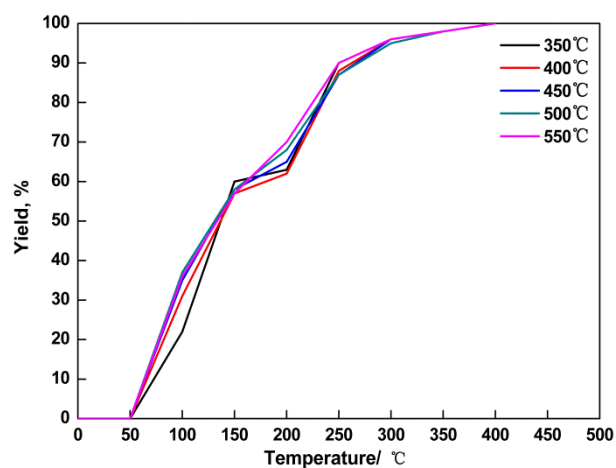

**Figure S2. Boiling point range of OLP from the catalytic conversion of cyclohexanone at various temperatures**

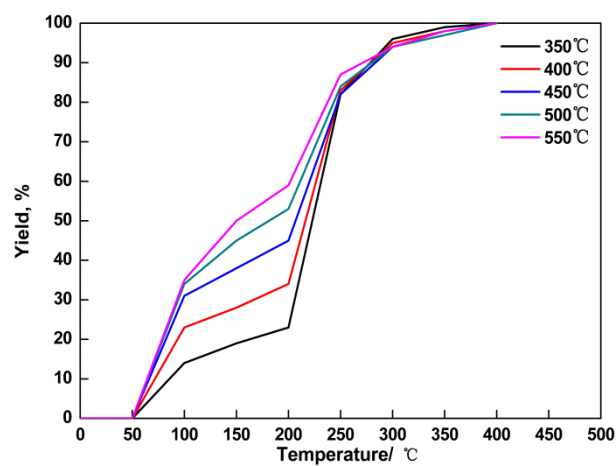

**Figure S3. Boiling point range of OLP from the catalytic conversion of bicyclic ketones at various temperatures**

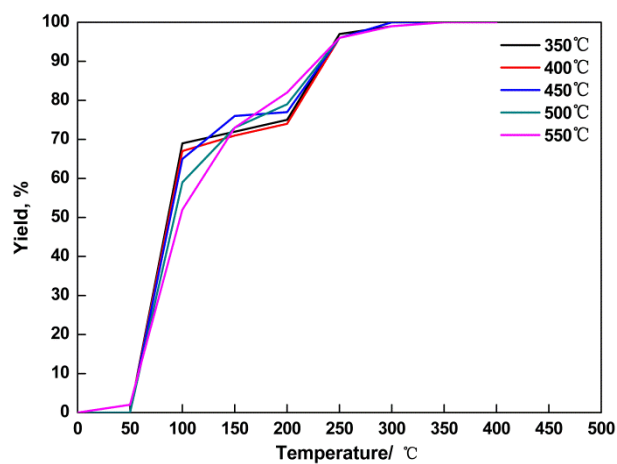

**Figure S4. Boiling point range of OLP from the catalytic conversion of oxydicyclohexane at various temperatures**

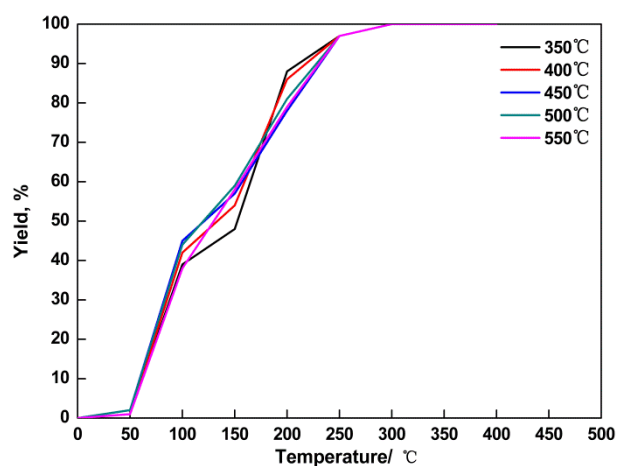

**Figure S5. Boiling point range of OLP from the catalytic conversion of cyclohexyl butyrate at various temperatures**
